# Supplementary material for: Case study observational research: inflammatory cytokines in the bronchial epithelial lining fluid of COVID-19 patients with acute hypoxemic respiratory failure
Source: Springer Nature journal article supplement (doi:10.1186/s13054-024-04921-3), 2024-04-23
Supplement: MOESM1 [file 27008310]

**Table S1.** Major characteristics of patients and volunteers

| characteristics                                       | volunteers          | COVID-19 patients    |
|-------------------------------------------------------|---------------------|----------------------|
| n                                                     | 6                   | 27                   |
| Sex: female/male, n/n                                 | 5/1                 | 6/21                 |
| Age (years old)                                       | 75.5 [63.0-78.3]    | 64.0 [46.0-72.0]     |
| Body weight (kg)                                      | 53.2 [48.5-56.7]    | 70.0 [63.9-80.8]     |
| Height (cm)                                           | 149.3 [143.6-160.7] | 170.0 [162.0-174.0]  |
| Body mass index (BMI) (kg/m <sup>2</sup> )            | 23.4 [21.5-25.3]    | 24.1 [22.5-22.8]     |
| Period from onset to admission to our hospital (days) | -                   | 7.0 [6.0-9.0]        |
| Period from onset to the tracheal intubation (days)   | -                   | 9.0 [6.0-11.0]       |
| ROX index before the tracheal intubation              | -                   | 5.2 [4.1-5.5]        |
| Laboratory data                                       |                     |                      |
| White blood cells (WBC) (/μL)                         | -                   | 8,900 [4,700-11,800] |
| C-reactive protein (CRP) (mg/dL)                      | -                   | 11.3 [4.2-19.4]      |
| Lactate dehydrogenase (LD) (U/L)                      | -                   | 509 [396-681]        |
| D-dimer (mg/L)                                        | -                   | 1.3 [0.8-3.8]        |
| Ferritin (μg/dL)                                      | -                   | 1,083 [597-1,756]    |
| Creatinine (Cr) (mg/dL)                               | -                   | 0.8 [0.7-1.2]        |
| Indices for pneumonia                                 |                     |                      |
| Pneumonia severity index (PSI)                        | -                   | 94.0 [78.0-151.0]    |
| Charlson Comorbidity Index (CCI)                      | -                   | 2.0 [0.0-2.0]        |
| Clinical outcomes                                     |                     |                      |
| Hospital length of stay (days)                        | -                   | 15.0 [11.5-32.3]     |
| Mortality, n (%)                                      | -                   | 4 [14.8%]            |

The data are shown as median (interquartile range: 25th - 75th percentile).
