# Supplementary material for: Case study observational research: inflammatory cytokines in the bronchial epithelial lining fluid of COVID-19 patients with acute hypoxemic respiratory failure
Source: Springer Nature journal article supplement (doi:10.1186/s13054-024-04921-3), 2024-04-23
Supplement: MOESM2 [file 27008310]

**Table S2.** Specific medications for COVID-19 patients with acute hypoxemic respiratory failure

| heparin                                       | dexamethasone | steroid pulse* | remdesivir | favipiravir | baricitinib | tocilizumab | case, n | %      |
|-----------------------------------------------|---------------|----------------|------------|-------------|-------------|-------------|---------|--------|
| <b>Therapy started before induction of MV</b> |               |                |            |             |             |             |         |        |
| +                                             | +             |                | +          |             | +           |             | 11      | 40.7%  |
| +                                             | +             |                | +          |             |             |             | 10      | 37.0%  |
| +                                             |               |                |            |             |             |             | 1       | 3.7%   |
| +                                             |               |                | +          |             |             |             | 1       | 3.7%   |
| +                                             | +             |                |            | +           |             |             | 1       | 3.7%   |
| +                                             | +             |                | +          | +           |             |             | 1       | 3.7%   |
| +                                             | +             |                | +          |             |             | +           | 1       | 3.7%   |
| +                                             |               | +              | +          |             | +           |             | 1       | 3.7%   |
| 27                                            | 24            | 1              | 25         | 2           | 12          | 1           | 27      | 100.0% |
| 100.0%                                        | 88.9%         | 3.7%           | 92.6%      | 7.4%        | 44.4%       | 3.7%        | 100.0   |        |
| <b>Therapy started after induction of MV</b>  |               |                |            |             |             |             |         |        |
|                                               |               |                |            |             |             | +           | 8       | 29.6%  |
|                                               | +             |                |            |             |             |             | 1       | 3.7%   |
|                                               |               |                | +          |             |             |             | 1       | 3.7%   |
|                                               |               |                |            |             | +           |             | 1       | 3.7%   |
|                                               | +             |                | +          |             | +           |             | 1       | 3.7%   |
| 27                                            | 2             | 0              | 2          | 0           | 2           | 8           | 12      | 44.4%  |
| 100.0%                                        | 7.4%          | 0.0%           | 7.4%       | 0.0%        | 7.4%        | 29.6%       | 44.4%   |        |

MV: mechanical ventilation, \*intravenous methylprednisolone therapy
