# Supplementary material for: Case study observational research: inflammatory cytokines in the bronchial epithelial lining fluid of COVID-19 patients with acute hypoxemic respiratory failure
Source: Springer Nature journal article supplement (doi:10.1186/s13054-024-04921-3), 2024-04-23
Supplement: MOESM3 [file 27008310]

**Table S3.** Measurement range and detection sensitivity of cytokines according to examples of the Bio-Rad BioPlex Pro® manual

| Kit name           | Cytokine      | Assay Working Range<br>(pmol/L) |          | Sensitivity<br>(pmol/L) |
|--------------------|---------------|---------------------------------|----------|-------------------------|
|                    |               | LLOQ                            | ULOQ     | LOD                     |
| GI 17-Plex panel   | G-CSF         | 0.34                            | 5537.55  | 0.19                    |
|                    | GM-CSF        | 0.03                            | 548.67   | 0.01                    |
|                    | IFN- $\gamma$ | 0.08                            | 1289.70  | 0.05                    |
|                    | IL-1 $\beta$  | 0.02                            | 268.51   | 0.01                    |
|                    | IL-2          | 0.08                            | 1366.90  | 0.05                    |
|                    | IL-4          | 0.01                            | 204.27   | 0.01                    |
|                    | IL-5          | 0.27                            | 4473.61  | 0.06                    |
|                    | IL-6          | 0.02                            | 298.76   | 0.02                    |
|                    | IL-7          | 0.11                            | 1,808.91 | 0.07                    |
|                    | IL-8          | 0.11                            | 1749.00  | 0.05                    |
|                    | IL-10         | 0.06                            | 1025.12  | 0.04                    |
|                    | IL12p70       | 0.02                            | 334.64   | 0.01                    |
|                    | IL-13         | 0.03                            | 419.27   | 0.02                    |
|                    | MCP-1         | 0.06                            | 1,018.02 | 0.05                    |
|                    | MIP-1 $\beta$ | 0.18                            | 182.15   | 0.18                    |
| TNF- $\alpha$      | 0.20          | 3209.76                         | 0.07     |                         |
| Th17 15-Plex panel | IL-17A        | 0.06                            | 937.24   | 0.02                    |
|                    | IL-17F        | 0.20                            | 1244.53  | 0.05                    |
|                    | IL-21         | 0.58                            | 9546.95  | 0.14                    |
|                    | IL-22         | 0.23                            | 709.35   | 0.02                    |
|                    | IL-23         | 0.34                            | 5,573.56 | 0.07                    |
|                    | IL-25         | 0.06                            | 980.54   | 0.004                   |
|                    | IL-31         | 0.24                            | 3,869.10 | 0.03                    |
|                    | IL-33         | 0.24                            | 3,869.10 | 0.03                    |
| sCD40L             | 0.13          | 2192.06                         | 0.02     |                         |

Note that in the data analysis, IL-12p40 and IL-17 from the GI 17-Plex panel were excluded due to their overlap with the Th17 15-Plex panel. Similarly, IFN- $\gamma$ , IL-1 $\beta$ , IL-4, IL-6, IL-10, and TNF- $\alpha$  from the Th17 15-Plex panel were not considered, as they are also present in the GI 17-Plex panel. LLOQ: lower limit of quantification, ULOQ: upper limit of quantification, LOD: limit of detection.
