# Supplementary material for: Case study observational research: inflammatory cytokines in the bronchial epithelial lining fluid of COVID-19 patients with acute hypoxemic respiratory failure
Source: Springer Nature journal article supplement (doi:10.1186/s13054-024-04921-3), 2024-04-23
Supplement: MOESM4 [file 27008310]

**Table S4.** Major characteristics of chronological groups

| Characteristics                                            | Pandemic 4th wave    | Pandemic 5th wave    | Pandemic 6th wave     | <i>p</i> value     |
|------------------------------------------------------------|----------------------|----------------------|-----------------------|--------------------|
| n                                                          | 9                    | 12                   | 6                     |                    |
| Sex: female/male, n/n                                      | 0/9                  | 5/7                  | 1/5                   | 0.071 <sup>a</sup> |
| Age (years old)                                            | 64.0 [50.5-62.5]     | 53.5 [42.5-68.8]     | 72.0 [54.0-86.8]      | 0.133              |
| Body weight (kg)                                           | 70.0 [63.4-95.0]     | 70.0 [64.2-75.6]     | 70.3 [63.2-75.7]      | 0.882              |
| Height (cm)                                                | 170.0 [162.3-176.0]  | 167.5 [161.0-174.5]  | 170.0 [164.0-171.3]   | 0.869              |
| body mass index (BMI) (kg/m <sup>2</sup> )                 | 27.3 [21.6-30.7]     | 24.1 [22.8-28.7]     | 23.5 [21.6-25.0]      | 0.730              |
| Period from onset to admission to our hospital (days)      | 6.0 [5.5-7.0]        | 8.5 [7.0-10.5] †     | 9.0 [2.5-9.5]         | 0.024*             |
| Period from onset to the tracheal intubation for MV (days) | 8.0 [5.5-9.5]        | 9.0 [7.5-13.0]       | 6.5 [1.8-10.8]        | 0.216              |
| ROX index before the tracheal intubation                   | 5.30 [4.70-5.95]     | 4.95 [4.20-6.30]     | 3.95 [2.76-5.20]      | 0.216              |
| Laboratory data                                            |                      |                      |                       |                    |
| White blood cells (WBC) (/μL)                              | 6,100 [2,800-10,950] | 8,500 [5,550-12,925] | 10,950 [7,000-14,400] | 0.264              |
| C-reactive protein (CRP) (mg/dL)                           | 5.58 [3.24-13.131]   | 11.22 [3.61-18.96]   | 19.01 [14.05-21.32]   | 0.126              |
| Lactate dehydrogenase (LD) (U/L)                           | 439 [404-481]        | 638 [440-687]        | 533 [320-804]         | 0.208              |
| D-dimer (mg/L)                                             | 1.10 [0.80-1.70]     | 2.30 [0.80-3.40]     | 7.10 [1.13-47.63]     | 0.186              |
| Ferritin (μg/dL)                                           | 1,570 [928-2,387]    | 1,126 [604-1,686]    | 653 [266-1,089] †     | 0.035*             |
| Creatinine (Cr) (mg/dL)                                    | 0.92 [0.80-1.52]     | 0.68 [0.51-0.79] †   | 1.15 [0.82-1.82]      | 0.013*             |
| Indices for organ damage                                   |                      |                      |                       |                    |
| Pneumonia severity index (PSI)                             | 94.0 [78.0-178.5]    | 88.5 [72.0-101.5]    | 143.5 [121.0-173.3] ‡ | 0.025*             |
| Charlson Comorbidity Index (CCI)                           | 2.0 [2.0-2.5]        | 0.5 [0.0-1.0] †      | 1.5 [0.8-3.3]         | 0.006*             |
| Indices for pneumonia                                      |                      |                      |                       |                    |
| Lung infiltration volume (mL)                              | 1,357 [1,262-1,814]  | 1,123 [728-1,719]    | 1,300 [1,025-2,309]   | 0.378              |
| Lung infiltration volume (LIV) (%)                         | 40.6 [33.6-46.9]     | 37.6 [30.9-55.2]     | 62.8 [47.7-73.3]      | 0.075              |
| Clinical outcomes                                          |                      |                      |                       |                    |
| Hospitalization days (days)                                | 12.0 [6.0-63.0]      | 15.0 [13.5-27.8]     | 23.0 [13.0-32.5]      | 0.600              |
| Mortality, n (%)                                           | 3 (33.3%)            | 0 (0%)               | 1 (16.7%)             | 0.103 <sup>a</sup> |

The data are shown as the median (interquartile range: 25th - 75th percentile). \* $p < 0.05$ , statistically significant difference among groups. † $p < 0.05$  vs. pandemic 4th wave group, ‡ $p < 0.05$  vs. pandemic 5th wave group with the

Kruskal–Wallis test adjusted by the Bonferroni correction for multiple comparison tests. <sup>a</sup>Sex and mortality were statistically analyzed by the Pearson’s chi-square test. ROX index: respiratory rate oxygenation index.
