# Supplementary material for: Case study observational research: inflammatory cytokines in the bronchial epithelial lining fluid of COVID-19 patients with acute hypoxemic respiratory failure
Source: Springer Nature journal article supplement (doi:10.1186/s13054-024-04921-3), 2024-04-23
Supplement: MOESM5 [file 27008310]

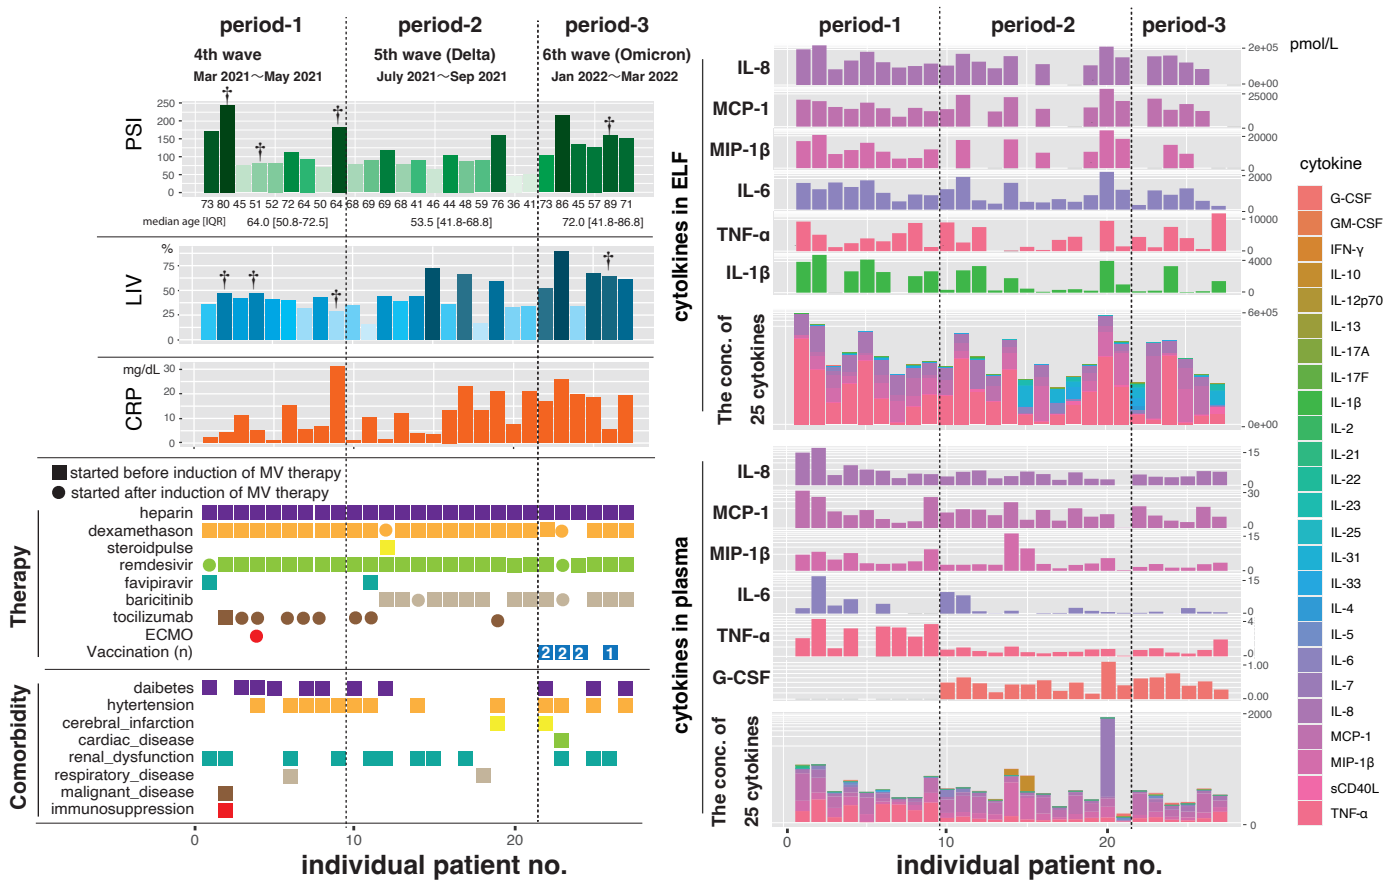

**Fig. S1.** The pneumonia severity index (PSI), lung infiltration volume (LIV), C-reactive protein (CRP) concentration in blood, and cytokine concentration in the ELF and plasma, provided therapies and comorbidities were recorded for individual patients who are arranged chronologically, including deceased patients (marked by †).
