# Supplementary material for: Case study observational research: inflammatory cytokines in the bronchial epithelial lining fluid of COVID-19 patients with acute hypoxemic respiratory failure
Source: Springer Nature journal article supplement (doi:10.1186/s13054-024-04921-3), 2024-04-23
Supplement: MOESM6 [file 27008310]

**Table S5.** Major characteristics of the three PSI groups

| Characteristics                                            | Mild PSI             | Moderate PSI        | Severe PSI            | <i>p</i> value     |
|------------------------------------------------------------|----------------------|---------------------|-----------------------|--------------------|
| n                                                          | 12                   | 7                   | 8                     |                    |
| Sex: female/male, n/n                                      | 1/11                 | 4/3 <sup>§</sup>    | 1/7                   | 0.035 <sup>§</sup> |
| Age (years old)                                            | 50.5 [45.3-65.8]     | 64.0 [46.5-72.0]    | 74.5 [65.8-84.5] ‡    | 0.013*             |
| Body weight (kg)                                           | 71.9 [67.2-90.2]     | 72.0 [64.6-90.3]    | 64.6 [57.0-71.0]      | 0.109              |
| Height (cm)                                                | 171.0 [164.8-177.3]  | 164.5 [160.0-174.0] | 169.0 [163.0-170.0]   | 0.333              |
| Body mass index (BMI) (kg/m <sup>2</sup> )                 | 26.9 [22.9-31.5]     | 23.6 [22.6-37.5]    | 21.7 [18.0-23.7]      | 0.391              |
| Period from onset to admission to our hospital (days)      | 7.0 [6.0-8.8]        | 9.0 [6.3-10.0]      | 6.0 [4.0-9.0]         | 0.110              |
| Period from onset to the tracheal intubation for MV (days) | 9.0 [8.0-12.5]       | 9.0 [6.5-10.0]      | 6.5 [1.3-9.8]         | 0.281              |
| ROX index before the tracheal intubation                   | 5.30 [4.50-6.50]     | 3.95 [3.00-4.90] †  | 5.35 [5.23-6.83]      | 0.022*             |
| Laboratory data                                            |                      |                     |                       |                    |
| White blood cells (WBC) (/μL)                              | 8,500 [6,175-13,450] | 4,700 [3,950-8,900] | 11,050 [8,350-12,800] | 0.079              |
| C-reactive protein (CRP) (mg/dL)                           | 9.0 [3.9-12.8]       | 13.5 [4.6-16.9]     | 19.6 [4.5-24.5]       | 0.315              |
| Lactate dehydrogenase (LD) (U/L)                           | 525 [442-675]        | 418 [390-681]       | 554 [404-680]         | 0.787              |
| D-dimer (mg/L)                                             | 1.15 [0.80-2.65]     | 0.90 [0.70-3.50]    | 6.75 [1.15-30.83]     | 0.101              |
| Ferritin (μg/dL)                                           | 1,407 [978-1,710]    | 597 [520-1,083]     | 963 [400-2,500]       | 0.122              |
| Creatinine (Cr) (mg/dL)                                    | 0.79 [0.72-0.91]     | 0.65 [0.62-1.03]    | 1.51 [0.94-2.47] ‡    | 0.015*             |
| Indices for organ damage                                   |                      |                     |                       |                    |
| Pneumonia severity index (PSI)                             | 78 [67-87]           | 105 [89-119] †      | 166 [153-208] †       | <0.001*            |
| Charlson Comorbidity Index (CCI)                           | 1.0 [0.0-2.0]        | 2.0 [1.0-2.0]       | 2.5 [0.3-3.8]         | 0.267              |
| Lung analysis                                              |                      |                     |                       |                    |
| Lung infiltration volume (mL)                              | 1,505 [958-1,866]    | 1,115 [715-1,279]   | 1,616 [1,276-2,070]   | 0.097              |
| Lung infiltration volume (LIV) (%)                         | 39.9 [33.0-45.8]     | 44.1 [32.5-52.4]    | 52.8 [34.1-63.5]      | 0.492              |
| Clinical outcomes                                          |                      |                     |                       |                    |
| Hospital length of stay (days)                             | 14.5 [7.8-21.0]      | 13.0 [7.5-30.0]     | 32.0 [21.0-53.0]      | 0.068              |
| Mortality, n (%)                                           | 1 (8.3%)             | 0 (0.0%)            | 3 (37.5%)             | 0.087*             |

The data are shown as the median (interquartile range: 25th - 75th percentile). \* $p < 0.05$ , statistically significant difference among groups. † $p < 0.05$  vs. pandemic 4th wave group, ‡ $p < 0.05$  vs. pandemic 5th wave group. ROX index: respiratory rate oxygenation index. with Kruskal–Wallis test adjusted by the Bonferroni correction for multiple comparison tests. <sup>§</sup>Sex and mortality was statistically analyzed with  $p < 0.05$ , according to the Pearson's chi-square test. ROX index: respiratory rate oxygenation index.
