# Supplementary material for: Case study observational research: inflammatory cytokines in the bronchial epithelial lining fluid of COVID-19 patients with acute hypoxemic respiratory failure
Source: Springer Nature journal article supplement (doi:10.1186/s13054-024-04921-3), 2024-04-23
Supplement: MOESM7 [file 27008310]

**Table S6.** Major characteristics of the three LIV groups

| Characteristics                                            | Mild LIV              | Moderate LIV        | Severe LIV            | <i>p</i> value     |
|------------------------------------------------------------|-----------------------|---------------------|-----------------------|--------------------|
| n                                                          | 11                    | 8                   | 8                     |                    |
| Sex: female/male, n/n                                      | 2/9                   | 2/6                 | 2/6                   | 0.916 <sup>a</sup> |
| Age (years old)                                            | 64.0 [44.0-68.0]      | 51.5 [46.3-71.3]    | 72.0 [50.3-83.5]      | 0.178              |
| Body weight (kg)                                           | 66.3 [65.1-75.8]      | 80.9 [60.5-95.0]    | 70.8 [64.5-74.3]      | 0.677              |
| Height (cm)                                                | 170.0 [166.0-174.0]   | 168.3 [160.0-177.5] | 169.0 [162.5-172.3]   | 0.909              |
| Body mass index (BMI) (kg/m <sup>2</sup> )                 | 22.8 [21.7-24.1]      | 27.6 [19.0-31.5]    | 24.6 [22.9-25.3]      | 0.967              |
| Period from onset to admission to our hospital (days)      | 8.0 [6.0-9.0]         | 6.5 [5.3-7.0]       | 9.0 [7.0-10.0]        | 0.902              |
| Period from onset to the tracheal intubation for MV (days) | 9.0 [6.0-11.0]        | 8.0 [6.3-10.8]      | 9.0 [5.0-12.3]        | 0.917              |
| ROX index before the tracheal intubation                   | 5.30 [4.70-6.80]      | 4.90 [3.30-6.23]    | 4.70 [3.36-5.20]      | 0.204              |
| Laboratory data                                            |                       |                     |                       |                    |
| White blood cells (WBC) (/μL)                              | 10,300 [6,900-11,800] | 4,500 [2,425-8,200] | 10,500 [6,725-13,275] | 0.060              |
| C-reactive protein (CRP) (mg/dL)                           | 12.0 [5.6-19.9]       | 4.6 [2.1-10.1]      | 19.0 [8.2-22.5] ‡     | 0.036*             |
| Lactate dehydrogenase (LD) (U/L)                           | 594 [418-681]         | 444 [389-626]       | 628 [360-678]         | 0.662              |
| D-dimer (mg/L)                                             | 1.10 [0.80-2.70]      | 1.15 [0.73-3.18]    | 3.45 [1.00-16.6]      | 0.320              |
| Ferritin (μg/dL)                                           | 1,337 [574-2,670]     | 928 [6121,578]      | 952 [523-1,383]       | 0.303              |
| Creatinine (Cr) (mg/dL)                                    | 0.76 [0.63-1.51]      | 0.83 [0.69-1.00]    | 0.98 [0.64-1.20]      | 0.889              |
| Indices for organ damage                                   |                       |                     |                       |                    |
| Pneumonia severity index (PSI)                             | 89 [78-136]           | 87 [77-117]         | 139 [92-159]          | 0.357              |
| Charlson Comorbidity Index CCI)                            | 1.0 [0.0-2.0]         | 2.0 [2.0-3.5]       | 1.0 [0.0-1.8]         | 0.136              |
| Lung analysis                                              |                       |                     |                       |                    |
| Lung infiltration volume (mL)                              | 966 [573-1,357]       | 1,416 [1,257-1,847] | 1,618 [1,200-2,088]   | <0.600             |
| Lung infiltration volume (LIV) (%)                         | 33.5 [28.9-35.7]      | 43.5 [41.0-46.1] †  | 65.1 [59.4-71.1] †    | <0.001*            |
| Clinical outcome                                           |                       |                     |                       |                    |
| Hospital length of stay (days)                             | 21.0 [13.0-30.0]      | 12.5 [6.3-58.5]     | 21.0 [14.0-33.0]      | 0.558              |
| Mortality, n (%)                                           | 1 (9.1%)              | 2 (25.0%)           | 1 (12.5%)             | 0.614 <sup>a</sup> |

The data are shown as the medians (interquartile ranges: 25th-75th percentiles). \* $p < 0.05$  indicates a statistically significant difference among groups. † $p < 0.05$  vs. pandemic 4th wave group, ‡ $p < 0.05$  vs. pandemic 5th wave group. ROX index: respiratory rate oxygenation index, with Kruskal–Wallis test adjusted by the Bonferroni correction for multiple comparisons. <sup>a</sup>Sex and mortality were statistically analyzed with § $p < 0.05$ , according to the Pearson’s chi-square test. ROX index: respiratory rate oxygenation index, PSI: Pneumonia severity index.
